# Supplementary figures and images for: Single-Cell RNA Sequencing Combined with Single-Cell Genome-Wide Association Study Identifies SF3B4 as a hub Gene in Hepatocellular Carcinoma Progression
Source: Research Square preprint supplement (doi:10.21203/rs.3.rs-8020835/v1), 2025-12-05

**Figure 9C**

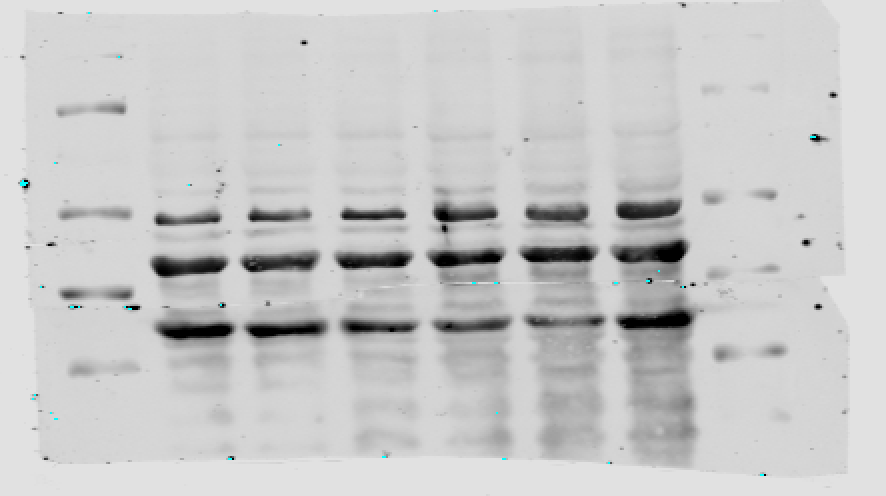


**Figure 10B**


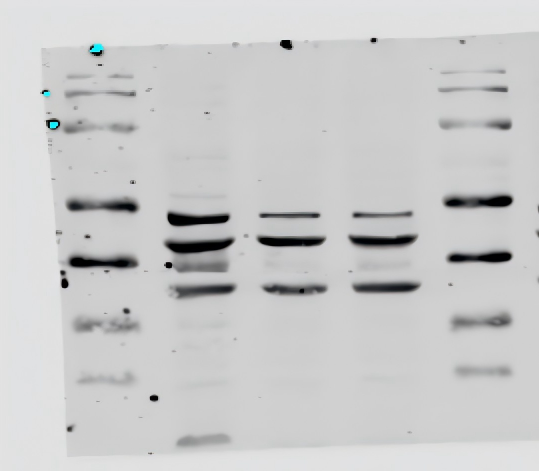


**Figure 10D**

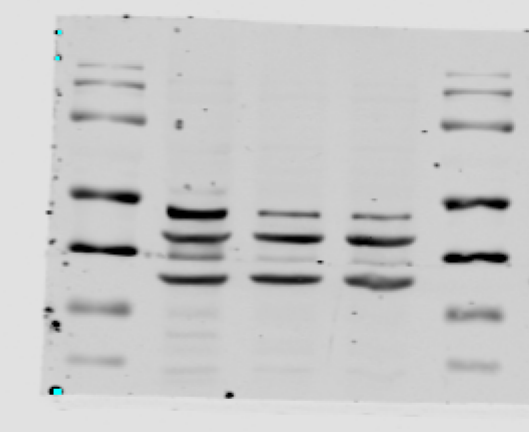


35KD

40KD

55KD

55KD

35KD

40KD

35KD

40KD

55KD

Supplement: Supplementary file 1 [file 4929d7acac7317866b39fc94.docx]
